# Supplementary material
Source: HighWire-hosted journal article supplement (https://rc.rcjournal.com/highwire/filestream/16367/field_highwire_adjunct_files/1/suppl.2.pdf)
Supplement: suppl.2.pdf [file suppl.2.pdf]

Detailed forest plots

**Efficacy of interventions aiming at improving respiratory function after stroke: A systematic review.**

Kênia KP Menezes, Lucas R Nascimento, Patrick R Avelino, Luci F Teixeira-Salmela

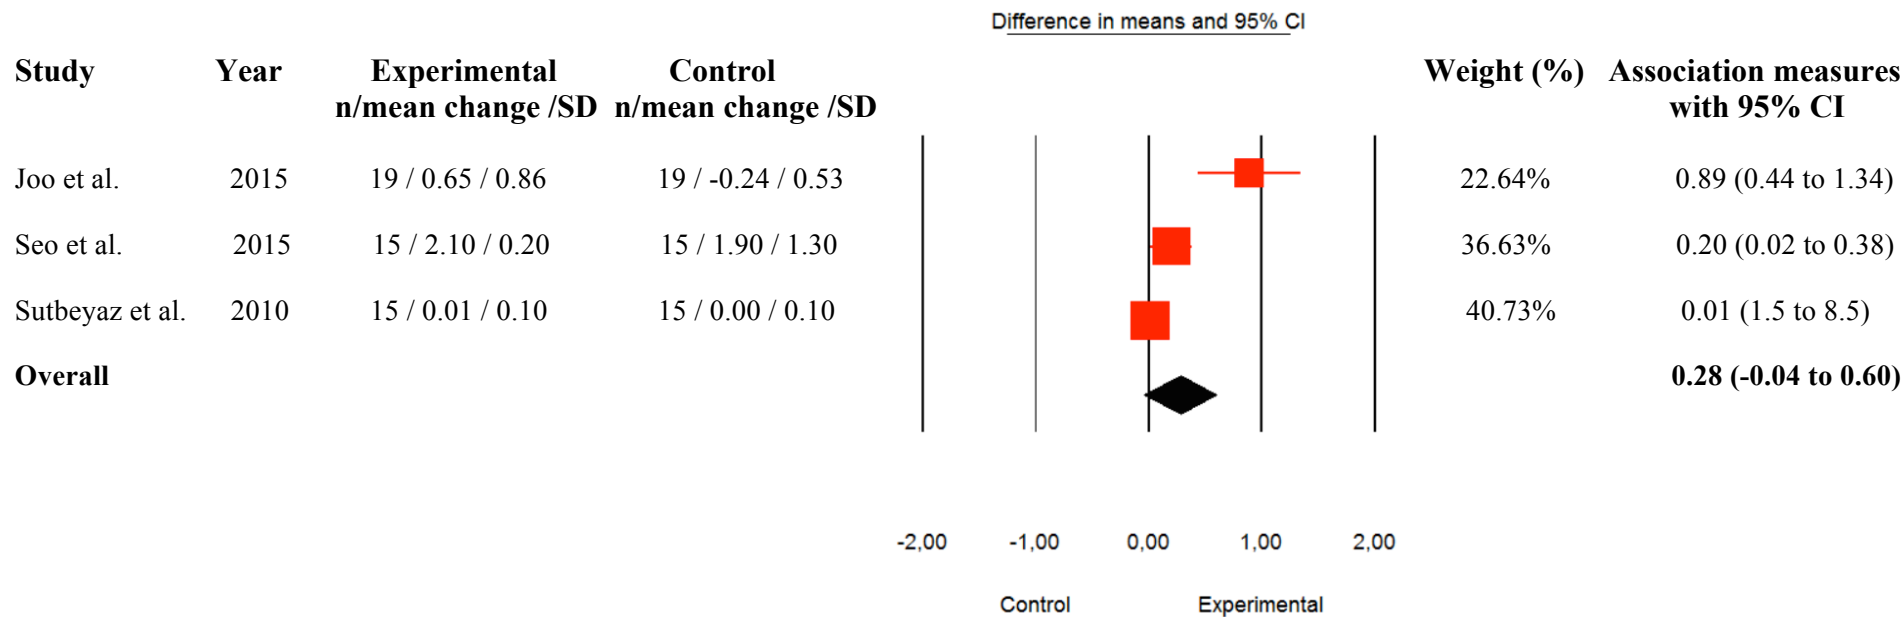

**Figure 8.** Mean difference (95% CI) of the effect of breathing exercises versus nothing/sham intervention on forced vital capacity, in L (n=98), with a random-effects model,  $I^2=54\%$ .

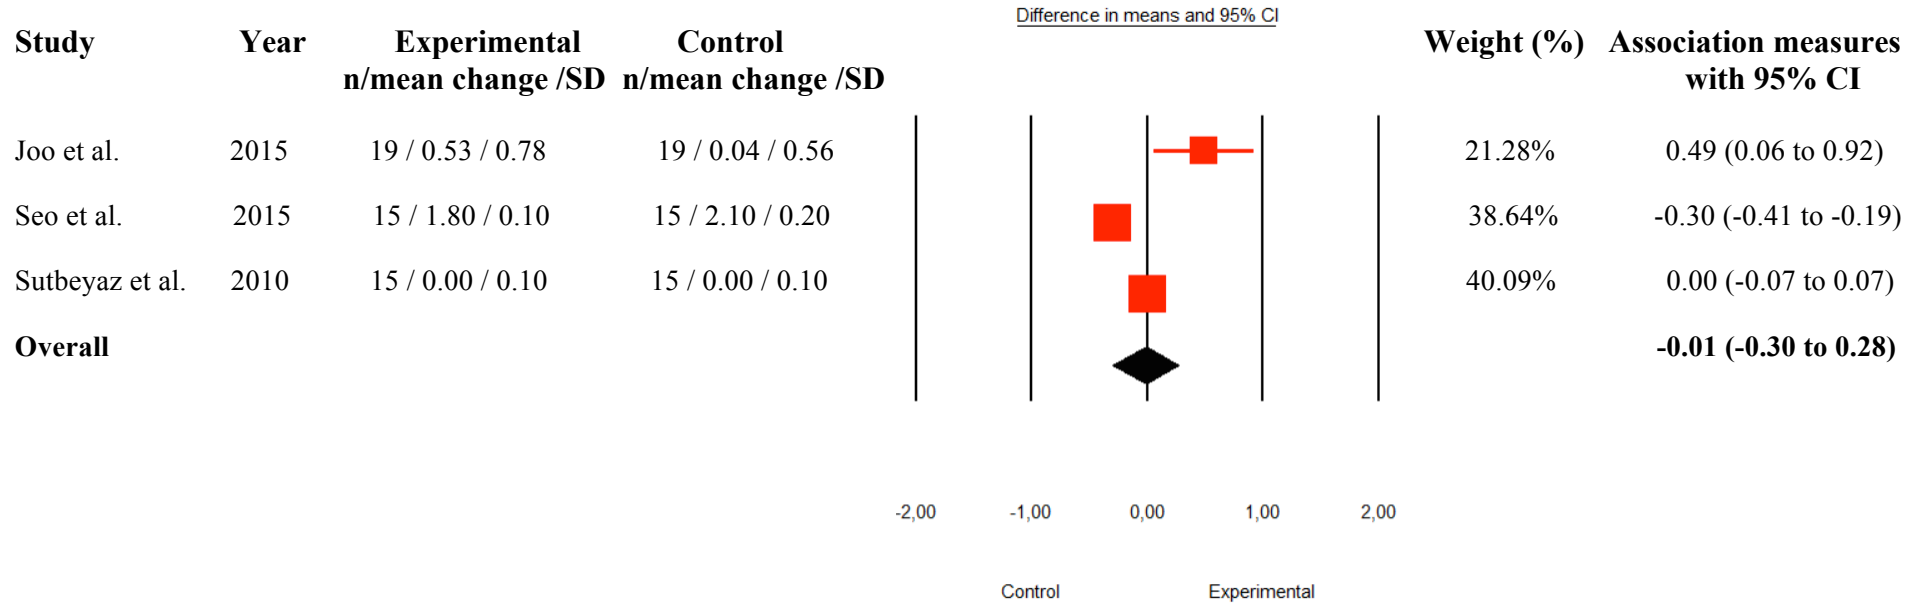

**Figure 9.** Mean difference (95% CI) of the effect of breathing exercises versus nothing/sham intervention on forced expiratory volume in 1 second, in L (n=98), with a random-effects model,  $I^2 = 50\%$ .



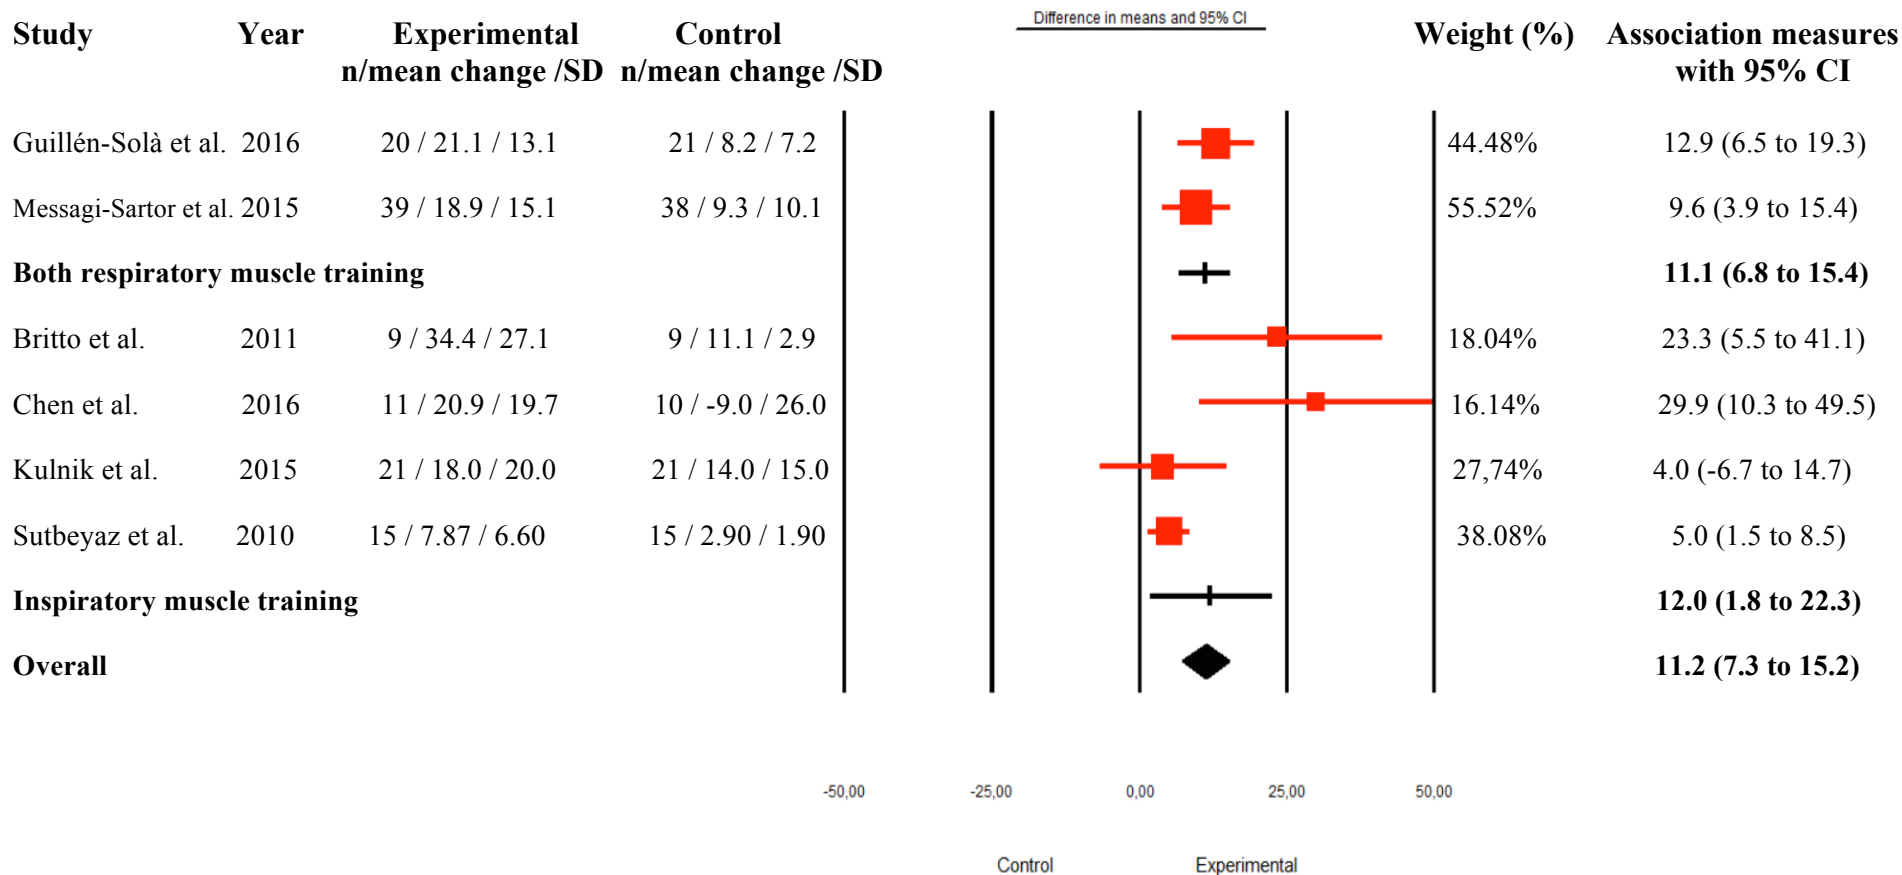

**Figure 11.** Mean difference (95% CI) of the effect of respiratory muscle training versus nothing/sham intervention on inspiratory muscle strength, in cmH<sub>2</sub>O (n=229), with a random-effects model, I<sup>2</sup> =0%.











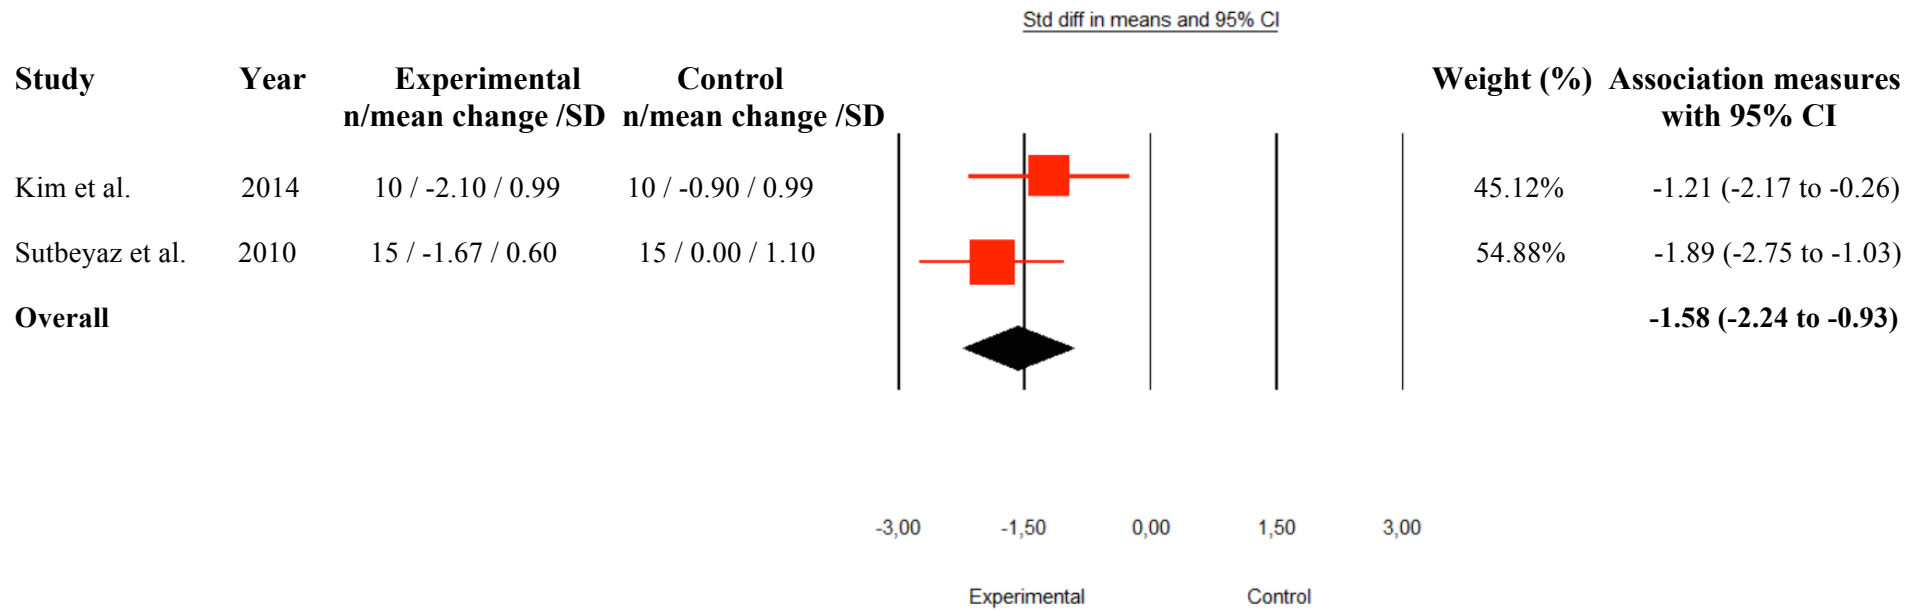

**Figure 16.** Mean difference (95% CI) of the effect of respiratory muscle training versus nothing/sham intervention on dyspnea, (n=50), with a random-effects model,  $I^2=0\%$ .

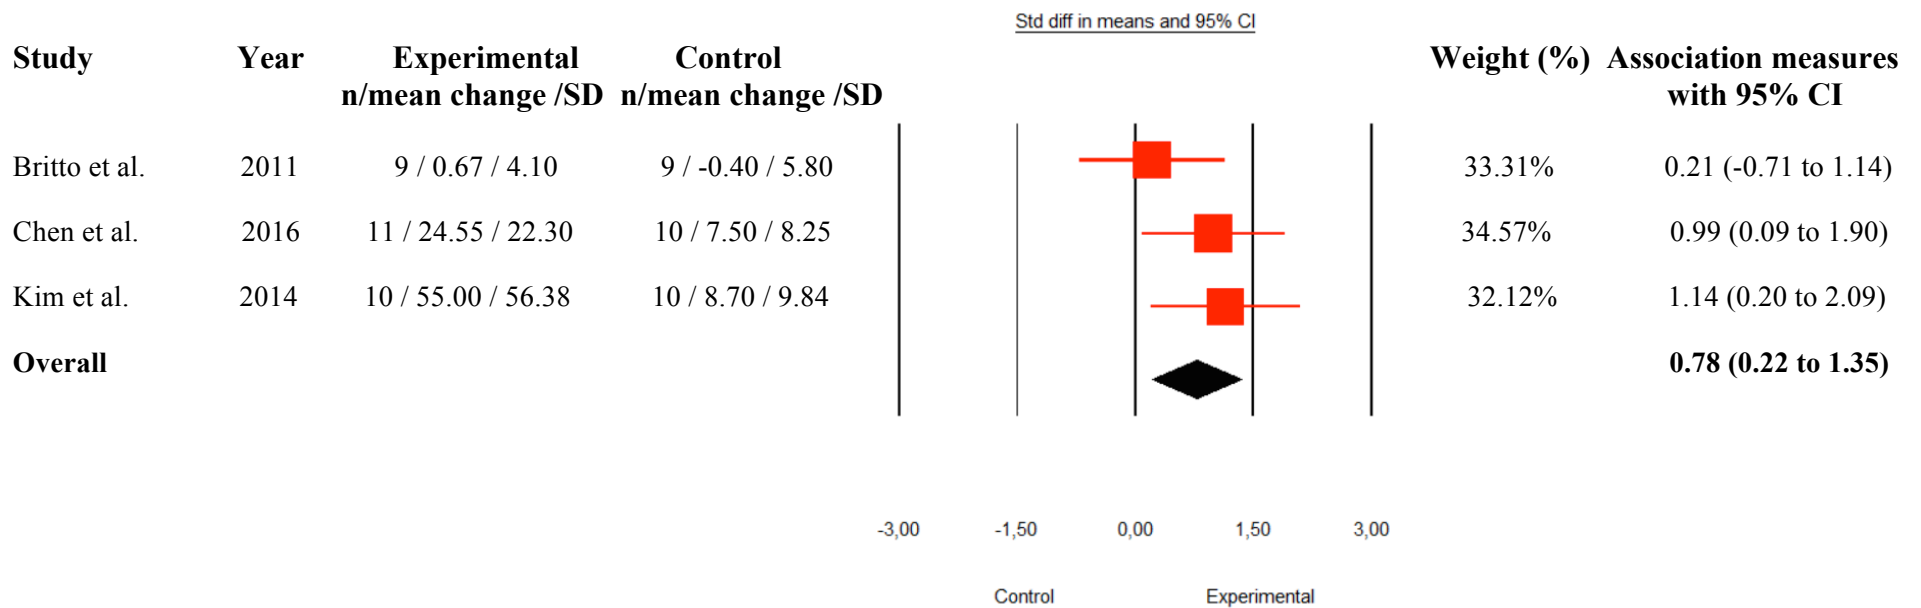

**Figure 17.** Mean difference (95% CI) of the effect of respiratory muscle training versus nothing/sham intervention on activity (n=59), with a random-effects model,  $I^2 = 0\%$ .
